# Supplementary material for: Sinking CO2 in Supercritical Reservoirs
Source: PubMed Central journal article supplement (PMC7780548; doi:10.1029/2020gl090456), 2020-11-29

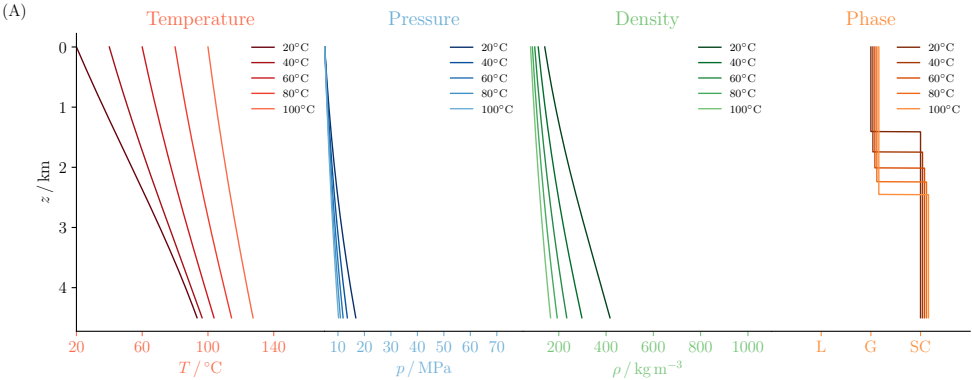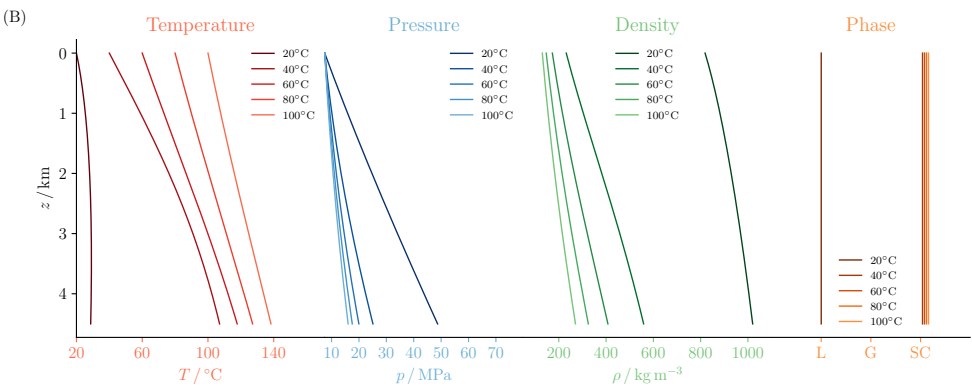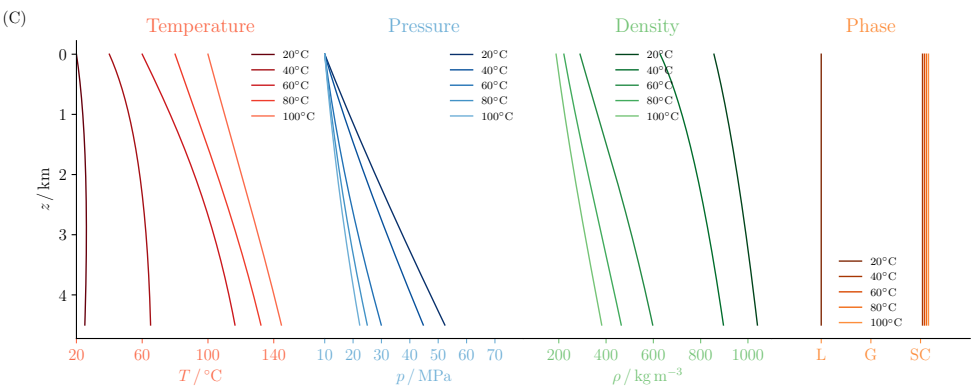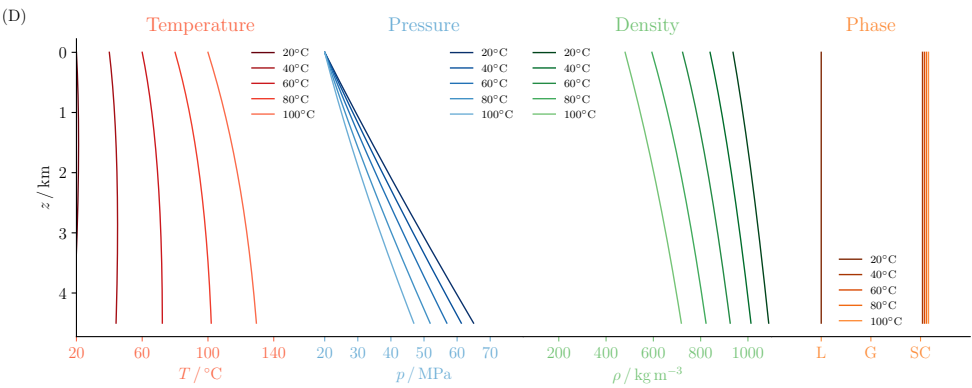

Supplement: GRL-47-e2020GL090456-s002.pdf [file GRL-47-e2020GL090456-s002.pdf]
